# Supplementary material for: The rhodium complex of bis(diphenylphosphinomethyl)dopamine-coated magnetic nanoparticles as an efficient and reusable catalyst for hydroformylation of olefins
Source: Royal Society of Chemistry journal article supplement (doi:10.1039/c5nj01170a), 2015-01-01
Supplement: c5nj01170a1.pdf [file c5nj01170a1.pdf]

*Supporting Information*

**Rhodium complex of bis(diphenylphosphinomethyl) dopamine-coated  
magnetic nanoparticles as efficient and reusable catalyst for hydroformylation  
of olefins**

M. Nasiruzzaman Shaikh<sup>\*,a</sup>, M. Bououdina<sup>b</sup>, Abiola Azeez Jimoh<sup>a</sup>, Md. Abdul Aziz<sup>a</sup>, Aasif Helal<sup>a</sup>, Abbas Saeed Hakeem<sup>a</sup>, Zain H. Yamani<sup>a</sup>, Tae-Jeong Kim<sup>c</sup>

| <b>Table of Contents</b>               |                    |
|----------------------------------------|--------------------|
| <b>Data</b>                            | <b>Page Number</b> |
| <sup>1</sup> H NMR spectrum (S1)       | 2                  |
| <sup>31</sup> P NMR spectrum (S2)      | 3                  |
| TGA data (S3)                          | 4                  |
| Table for Rietveld refinements results | 5                  |
| GC and GC-MS spectra (S4-S12)          | 6-12               |

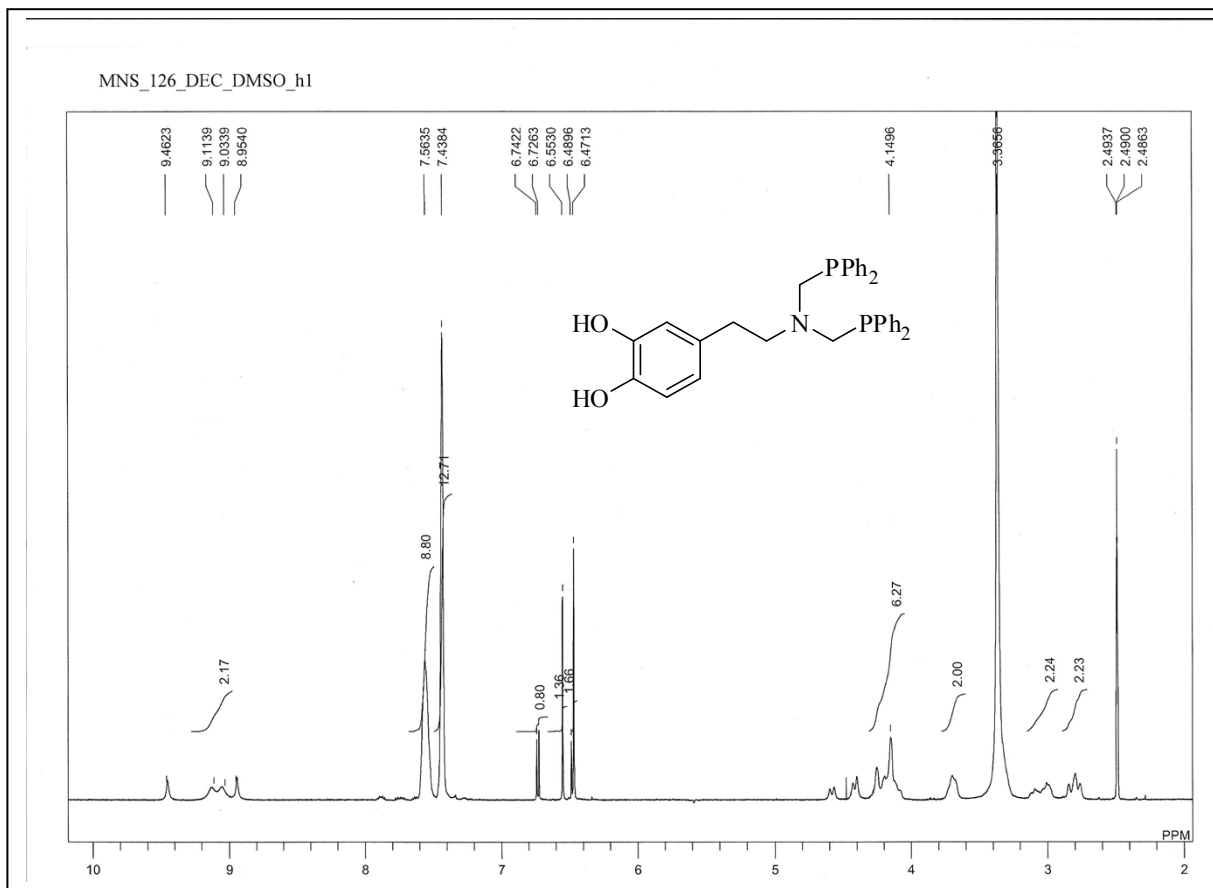

**S1:**  $^1\text{H}$  NMR spectra of bis(diphenylphosphinomethyl) dopamine in  $\text{DMSO-}d_6$  as solvent

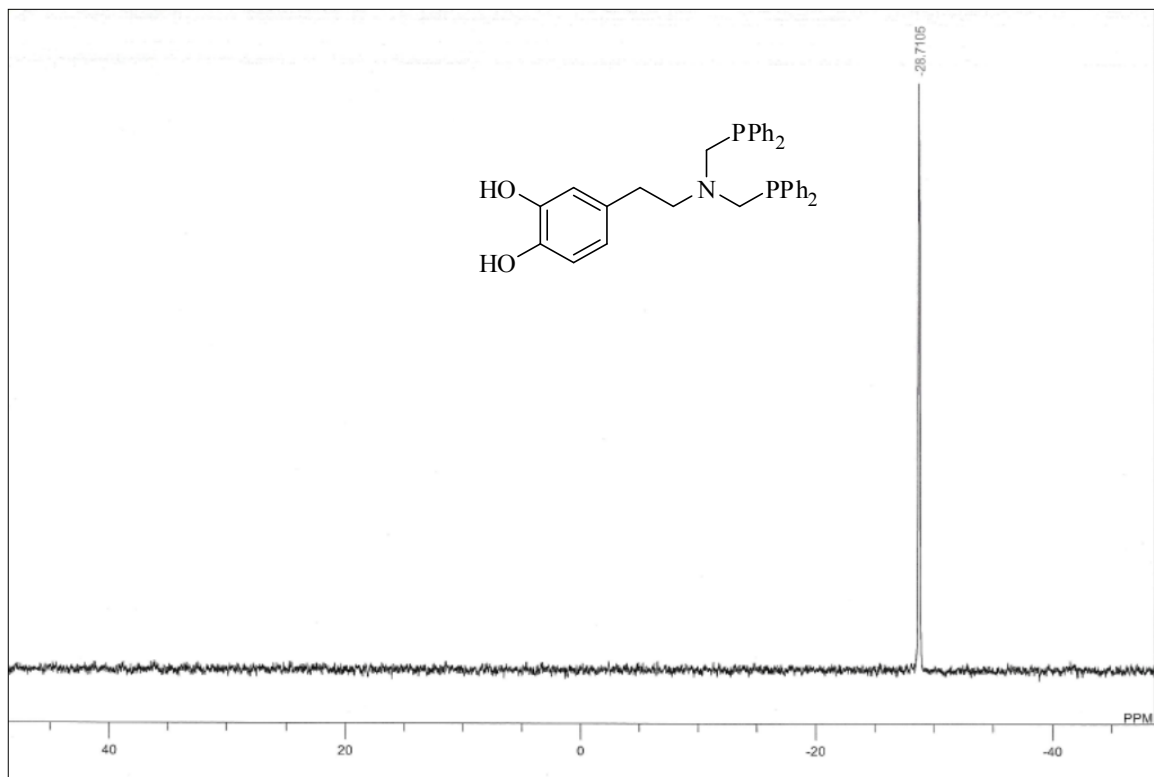

**S2:**  $^{31}\text{P}$ NMR spectra of bis(diphenylphosphinomethyl) dopamine in  $\text{DMSO-}d_6$  as solvent

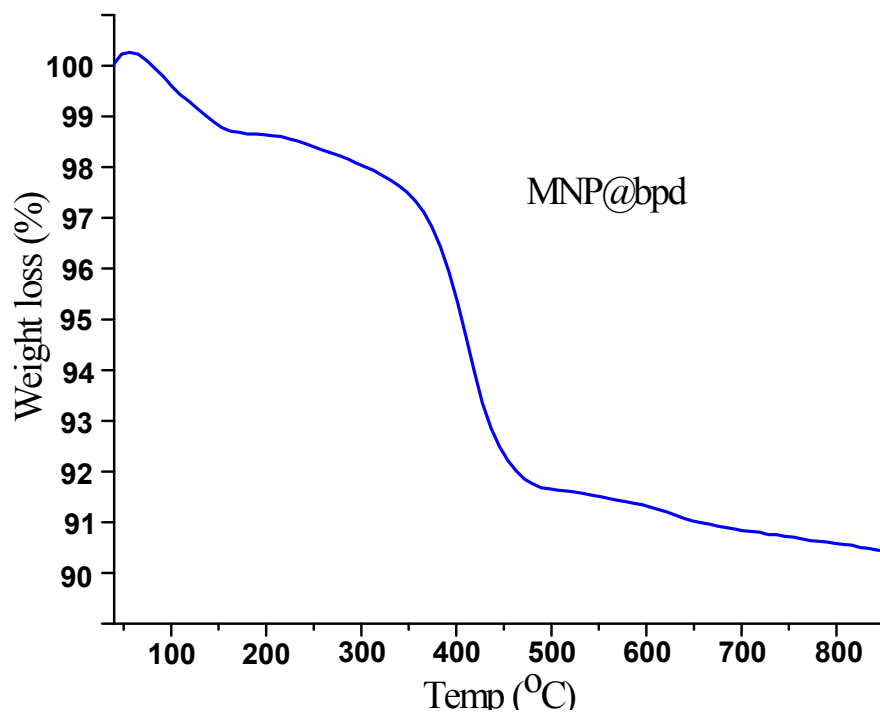

**S3:** TGA of the Fe<sub>3</sub>O<sub>4</sub>@bpd under argon atmosphere at 10°C/min heating rate

**Table 1.** Rietveld refinements results

| Composition                         | Crystallite size (nm) | Microstrain (%) | Lattice parameter (Å) | Goodness of Fit (GoF) |
|-------------------------------------|-----------------------|-----------------|-----------------------|-----------------------|
| Fe <sub>3</sub> O <sub>4</sub>      | 7.0                   | 0.160           | a= 8.390 (7)          | 1.06                  |
| Fe <sub>3</sub> O <sub>4</sub> @bpd | 7.2                   | 0.421           | a= 8.393 (8)          | 1.05                  |

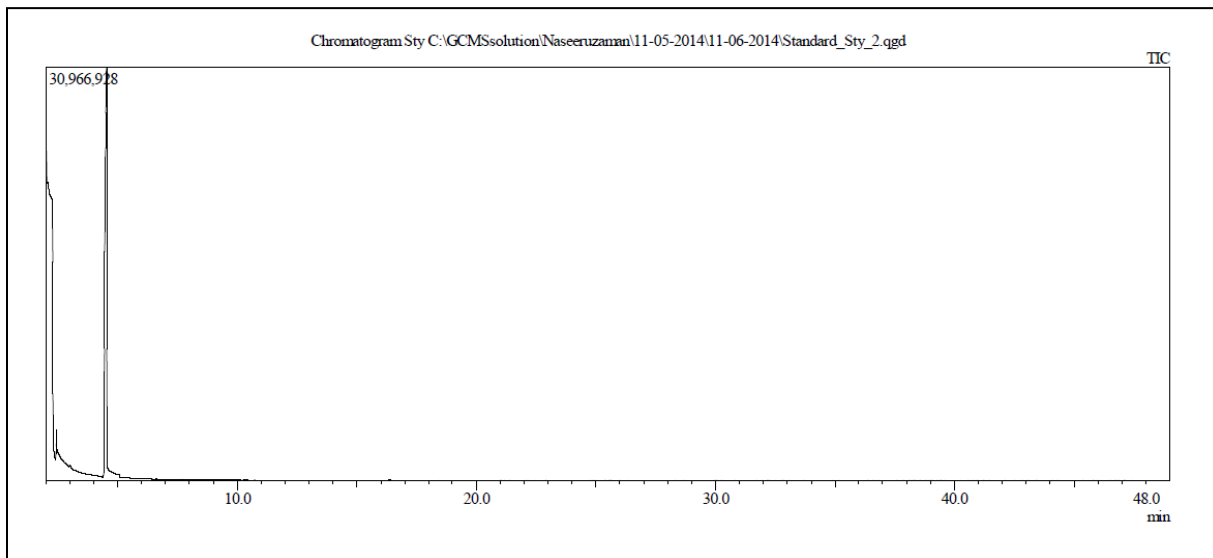

**S4:** GC spectrum of pure styrene in  $\text{CH}_2\text{Cl}_2$

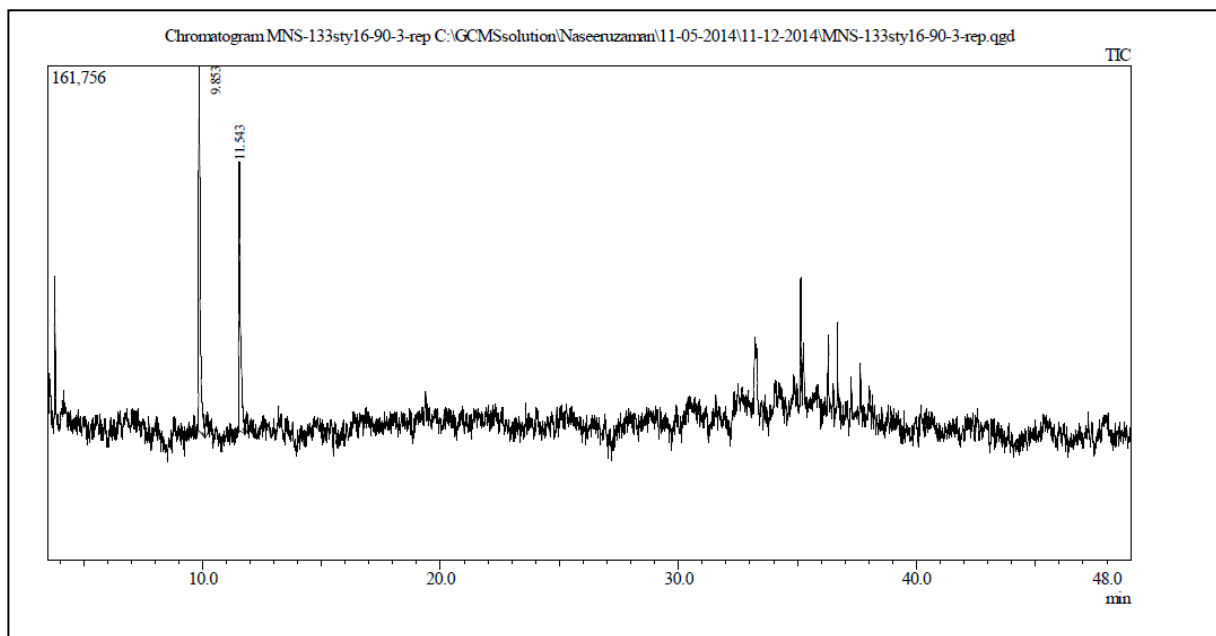

**S5:** GC spectrum of hydroformylated linear and branched product of styrene in  $\text{CH}_2\text{Cl}_2$

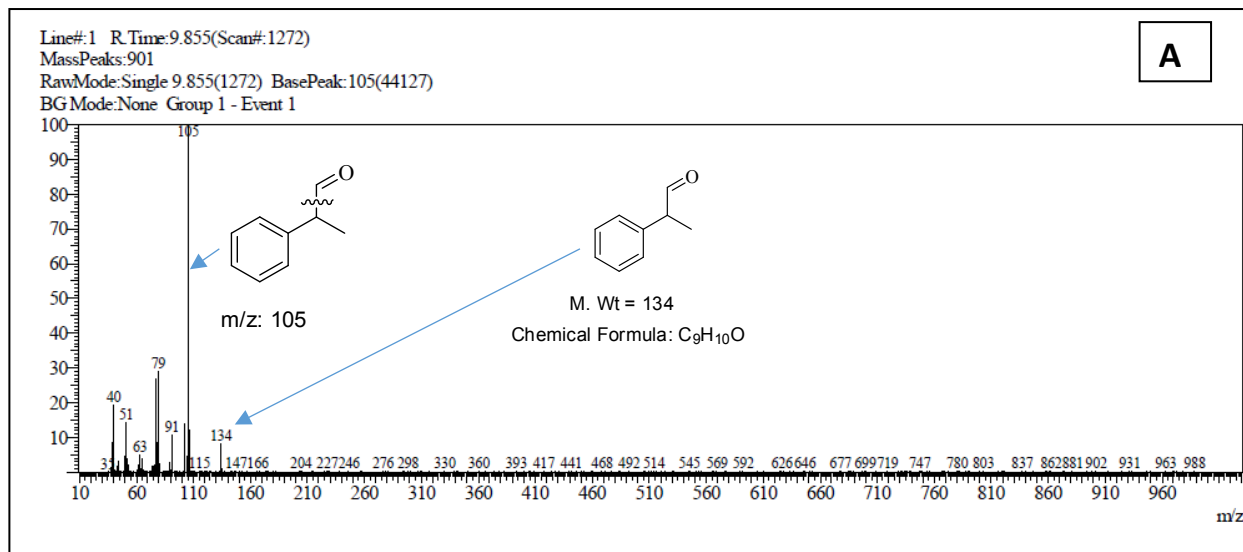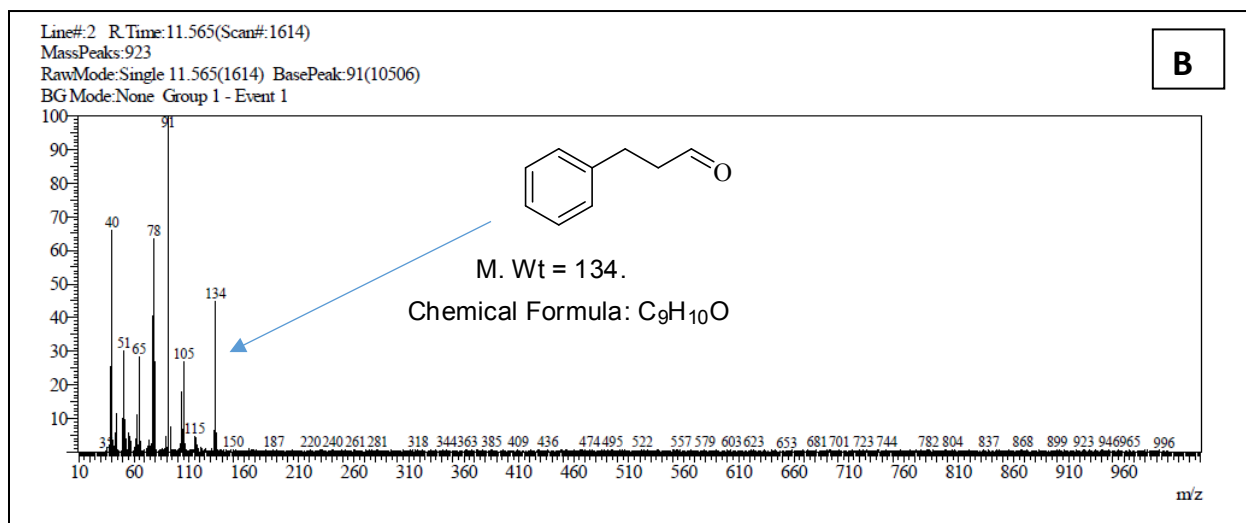

**S6:** Mass spectrum of hydroformylated A) branched and B) Linear product of styrene in CH<sub>2</sub>Cl<sub>2</sub>

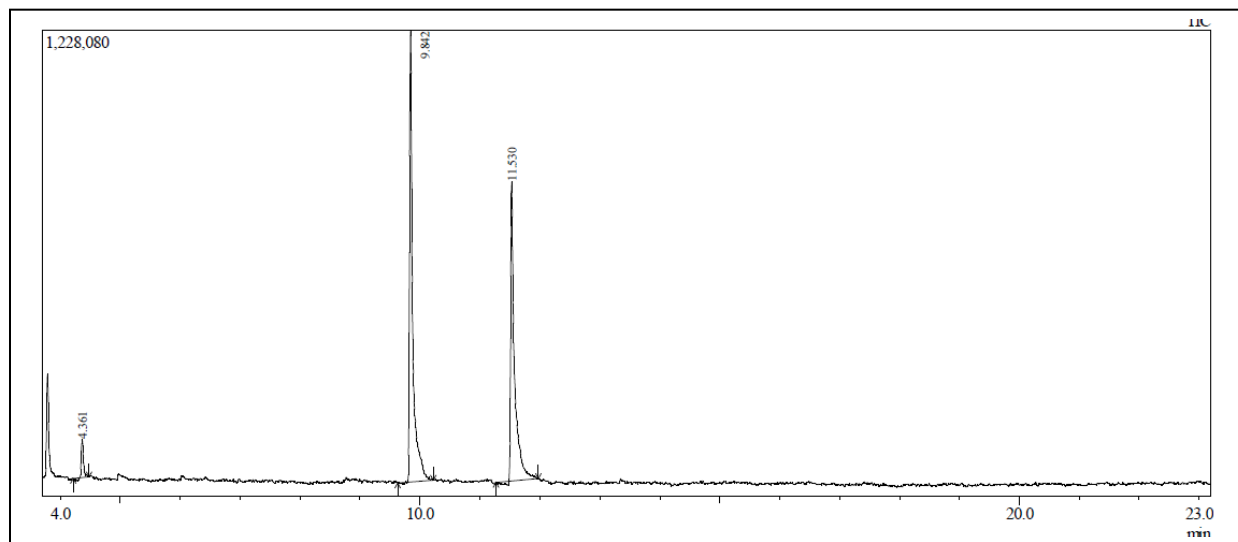

**S7:** GC spectrum of hydroformylated linear and branched product of styrene in  $\text{CH}_2\text{Cl}_2$  after 2<sup>nd</sup> cycle of the reaction



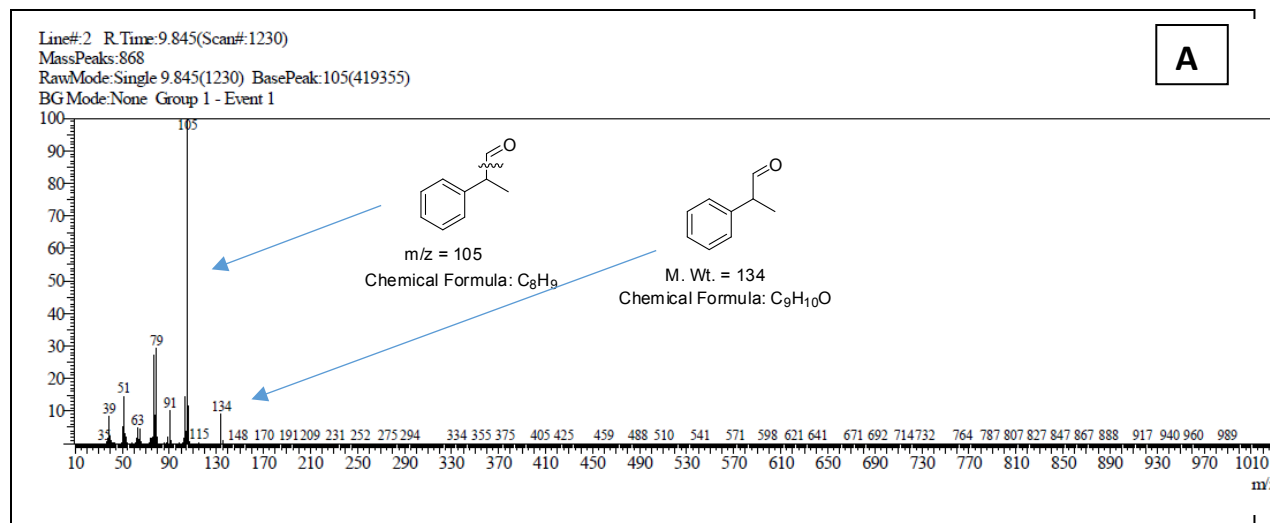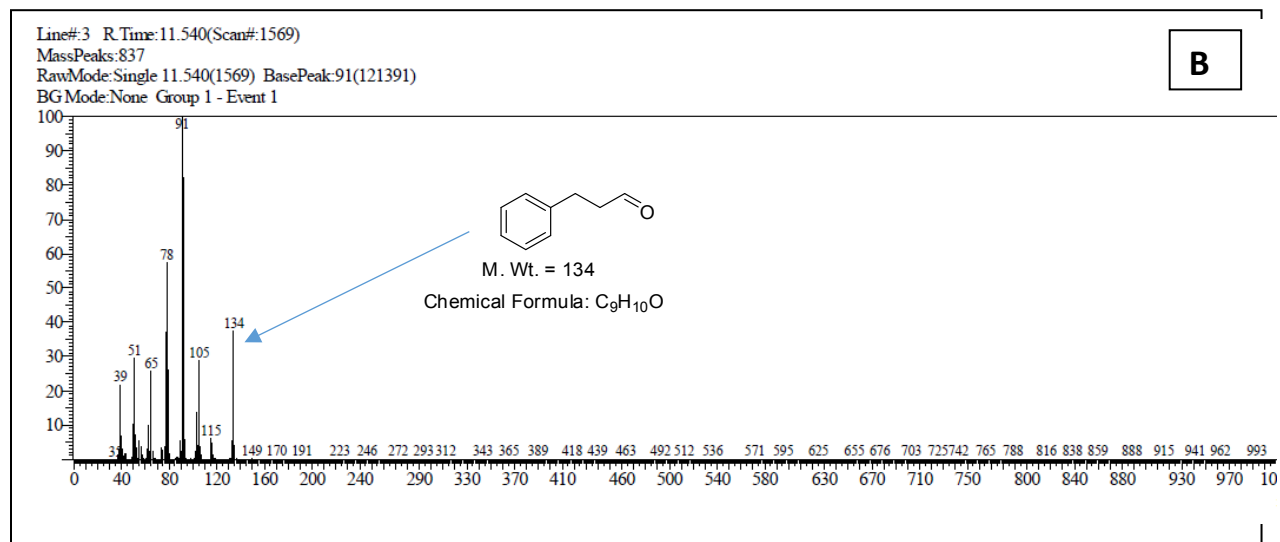

**S8:** Mass spectrum of hydroformylated A) Styrene (starting compound) B) branched and C) Linear product in  $CH_2Cl_2$

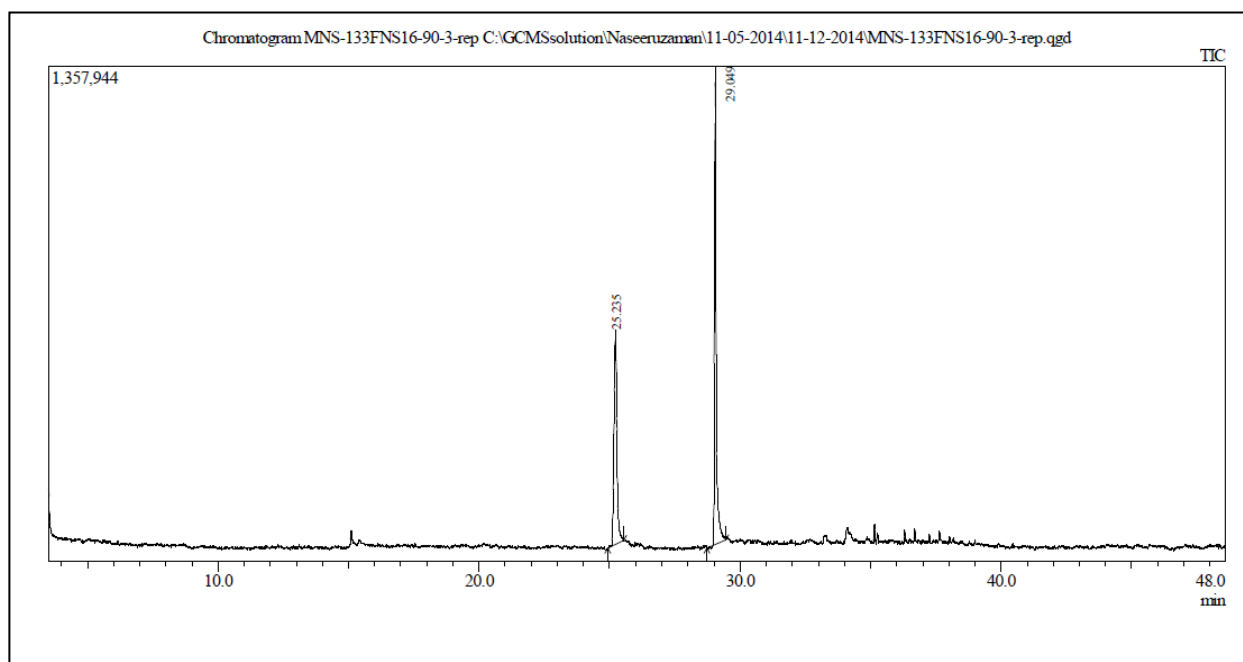

**S9:** GC spectrum of hydroformylated linear and branched product of 3-nitro styrene in  $\text{CH}_2\text{Cl}_2$

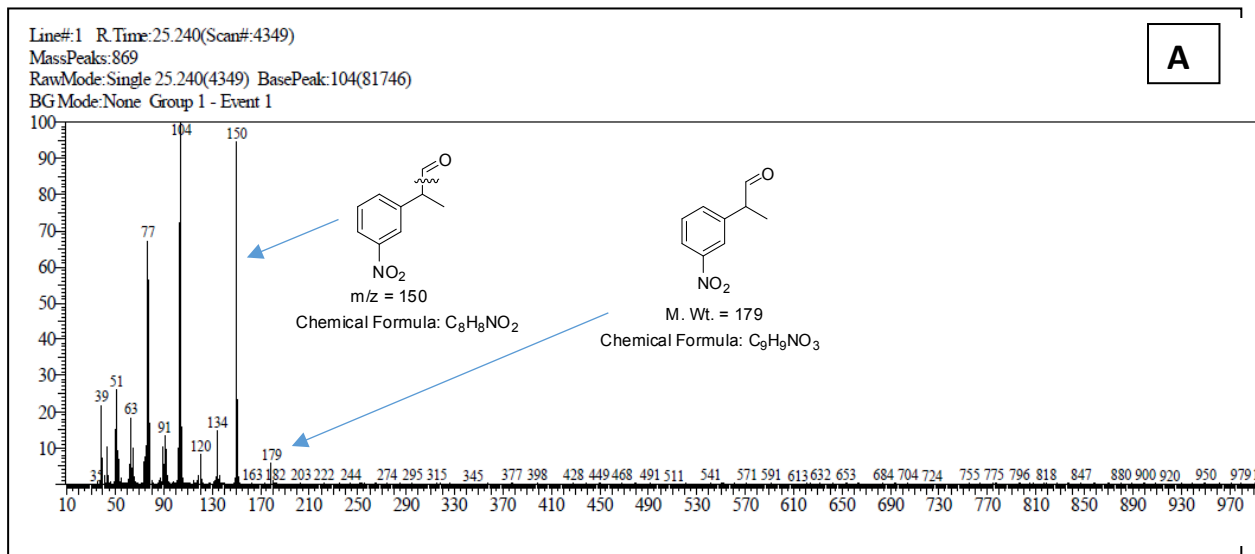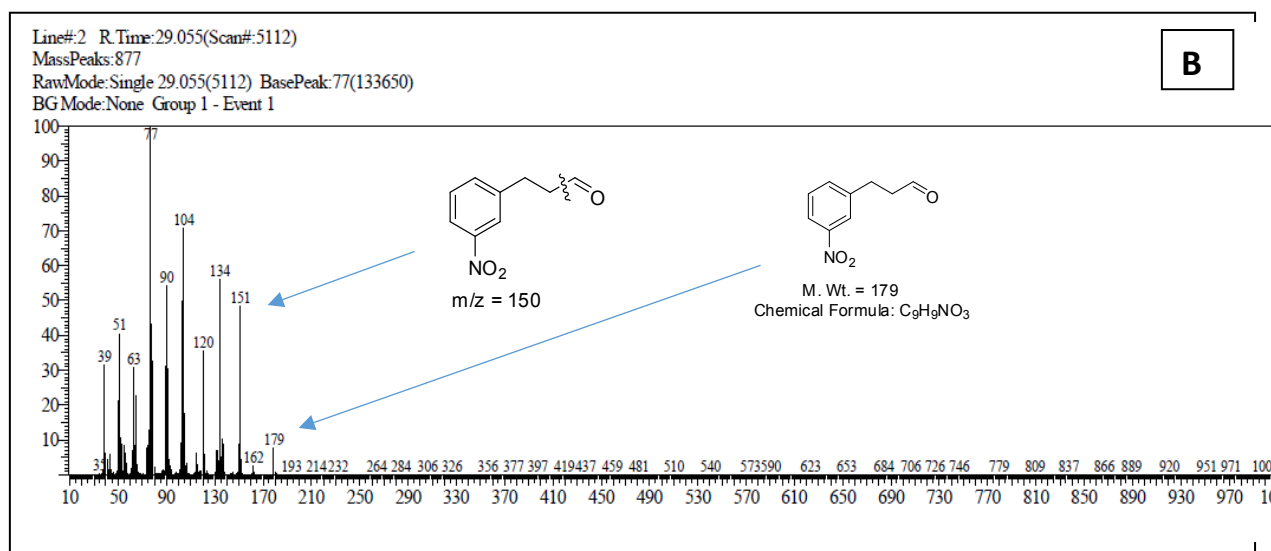

**S10:** Mass spectrum of hydroformylated A) branched and B) Linear product of 3-nitro styrene in  $CH_2Cl_2$
